# Supplementary material
Source: publisher site journal article supplement (https://www.spandidos-publications.com/3405/downloadSupplementary)
Supplement: Supplementary file 1 [file downloadSupplementary]

## Sheet: Table S3
Table SIII. Top 32 downregulated miRNAs in GSE74190 (filtration citeria, P-value < 0.05 and |LogFC| ≥ 1.2).
ID	adj.P.Val	P-value	t	B	logFC	miRNA_ID
hsa-miR-451	1.03e-27	7.49e-30	-15.4232	57.3612	-4.67434	hsa-miR-451
hsa-miR-144	4.92e-33	1.2e-35	-18.143	70.629	-4.64319	hsa-miR-144
hsa-miR-486-5p	1.03e-27	6.85e-30	-15.4409	57.4506	-3.71705	hsa-miR-486-5p
hsa-miR-338-3p	1.42e-14	4.33e-16	-9.464	25.8476	-2.93862	hsa-miR-338-3p
hsa-miR-126	1.55e-34	1.89e-37	-19.0303	74.7536	-2.84282	hsa-miR-126
hsa-miR-126*	1.72e-28	8.39e-31	-15.8571	59.5394	-2.65966	hsa-miR-126*
hsa-miR-144*	1.43e-20	2.09e-22	-12.1512	40.3026	-2.46099	hsa-miR-144*
hsa-miR-218	7.4e-26	7.21e-28	-14.5317	52.8179	-2.41243	hsa-miR-218
hsa-miR-139-5p	6.73e-24	7.38e-26	-13.6444	48.2117	-2.31753	hsa-miR-139-5p
hsa-miR-30a*	6.76e-15	1.98e-16	-9.60934	26.6263	-2.28119	hsa-miR-30a*
hsa-miR-30a	9.45e-21	1.27e-22	-12.2444	40.8011	-2.24013	hsa-miR-30a
hsa-miR-1	2.68e-12	1.01e-13	-8.44509	20.4419	-2.20134	hsa-miR-1
hsa-miR-145	4.83e-17	8.82e-19	-10.608	32.0014	-2.05762	hsa-miR-145
hsa-miR-133b	1.32e-16	2.58e-18	-10.4105	30.9368	-1.98717	hsa-miR-133b
hsa-miR-187*	8.62e-16	2.1e-17	-10.0236	28.8523	-1.95322	hsa-miR-187*
hsa-miR-143	4.8e-13	1.64e-14	-8.78754	22.246	-1.94889	hsa-miR-143
hsa-miR-145*	5.69e-14	1.8e-15	-9.19926	24.4331	-1.82285	hsa-miR-145*
hcmv-miR-UL70-3p	2.43e-08	1.6e-09	-6.55666	10.8989	-1.77683	hcmv-miR-UL70-3p
hsa-miR-497	5.8e-16	1.34e-17	-10.1062	29.2967	-1.66037	hsa-miR-497
hsa-miR-498	2.15e-15	5.75e-17	-9.83766	27.8521	-1.65667	hsa-miR-498
hsa-miR-140-3p	1.04e-18	1.64e-20	-11.3427	35.9624	-1.63274	hsa-miR-140-3p
hsa-miR-195	2.92e-15	8.17e-17	-9.77272	27.5031	-1.50403	hsa-miR-195
hsa-miR-551b	1.89e-05	2.03e-06	-5.00362	3.9202	-1.46773	hsa-miR-551b
hsa-miR-638	4.6e-08	3.19e-09	-6.41454	10.2199	-1.41758	hsa-miR-638
hsa-miR-101	3.02e-12	1.18e-13	-8.41636	20.2912	-1.40827	hsa-miR-101
hsa-miR-30b	3.75e-11	1.69e-12	-7.90938	17.6551	-1.39263	hsa-miR-30b
hsa-miR-34b	0.000131	1.68e-05	-4.49226	1.8788	-1.35126	hsa-miR-34b
hsa-miR-572	8.38e-05	1.03e-05	-4.61315	2.3479	-1.26566	hsa-miR-572
hsa-miR-150	0.000173	2.3e-05	-4.4128	1.5752	-1.23791	hsa-miR-150
hsa-miR-142-5p	3.39e-05	3.92e-06	-4.84736	3.2808	-1.23147	hsa-miR-142-5p
hsa-miR-328	2.69e-10	1.38e-11	-7.50395	15.5821	-1.22569	hsa-miR-328
hsa-miR-34c-5p	0.023	0.0052	-2.84821	-3.5295	-1.20422	hsa-miR-34c-5p
